# Supplementary material
Source: ML conference proceedings conference paper supplement (https://openaccess.thecvf.com/content/ICCV2023/html/Sun_Spatially-Adaptive_Feature_Modulation_ICCV_2023_paper.html)
Supplement: Supplementary file 1 [file Sun_Spatially-Adaptive_Feature_Modulation_ICCV_2023_supplemental.pdf]

# Spatially-Adaptive Feature Modulation for Efficient Image Super-Resolution

## - Supplemental Material -

Long Sun, Jiangxin Dong, Jinhui Tang, and Jinshan Pan\*

School of Computer Science and Engineering, Nanjing University of Science and Technology

### Overview

In this document, we further demonstrate the effectiveness of the proposed spatially-adaptive feature modulation and the LayerNorm layer in Section 1. Then, we evaluate our method with the challenge winners in Section 2. We further compare the proposed method with ViT-based lightweight SR models and classical performance-oriented SR methods in Section 3 and Section 4, respectively. Next, we make some notes on the Urban100 dataset in Section 5. Finally, we show more visual comparisons in Section 6.

## 1. Ablations of the spatially-adaptive feature modulation and the LayerNorm

**Effectiveness of the spatially-adaptive feature modulation.** As described in the main paper, the proposed spatially-adaptive feature modulation layer consists of three components: feature modulation (FM), multi-scale representation (MR), and feature aggregation (FA). To intuitively illustrate what the SAFM layer learns, we show some learned features in Figure 1, where the corresponding features are extracted before the upsampling layer. Figure 1 demonstrates that the deep features learned with SAFM layers contain much richer feature information and attend to more high-frequency details, facilitating the reconstruction of high-quality images.

**Effect of scales in the spatially-adaptive feature modulation.** We evaluate the effect of features at different scales in the spatially-adaptive feature modulation (SAFM) layer on the  $\times 4$  DIV2K validation set. Table 1 shows that removing any scale information deteriorates the reconstruction performance.

**Effect of the LayerNorm layer.** We show the visual results of different normalizations in Figure 2. As stated in the main paper, we obtained the results for the Frozen BatchNorm [5] and without the LayerNorm [2] before the training collapse. The model with BatchNorm layers generates images with unpleasant artifacts because it involves the estimated mean and variance of the entire training dataset during testing. The artifacts can be alleviated when we fix these estimates, as shown in Figure 2(c). Figure 2(d) and (f) show that applying normalization in the channel dimension can avoid the occurrence of artifacts. Compared to the  $L_2$  normalization, the model with LayerNorm layers produces more precise results. We, therefore, introduce LayerNorm layers for stable training and well convergence. The reasons behind the LayerNorm remain to be further investigated.

## 2. Comparison with the challenge winners

We further compare our method with solutions of the challenge champion, i.e., RFDN (winner of AIM 2020 Efficient Super-Resolution Challenge [17]) and RLFN (winner of NTIRE 2022 Efficient Super-Resolution Challenge [10]). Table 2 demonstrates that our approach obtains a noticeable improvement in all measures except the running time. Table 5 of the main paper shows that our slower running time is mainly due to the use of LayerNorm [2], which requires the mean and standard deviation of the input features in the inference phase. Without LayerNorm, the runtime improves to 8.35ms, which is very close to the speed of RLFN. As described in Section 1, however, the importance of LayerNorm prevents us from removing this module directly. We will explore feasible alternatives in our future work.

---

\*Corresponding author

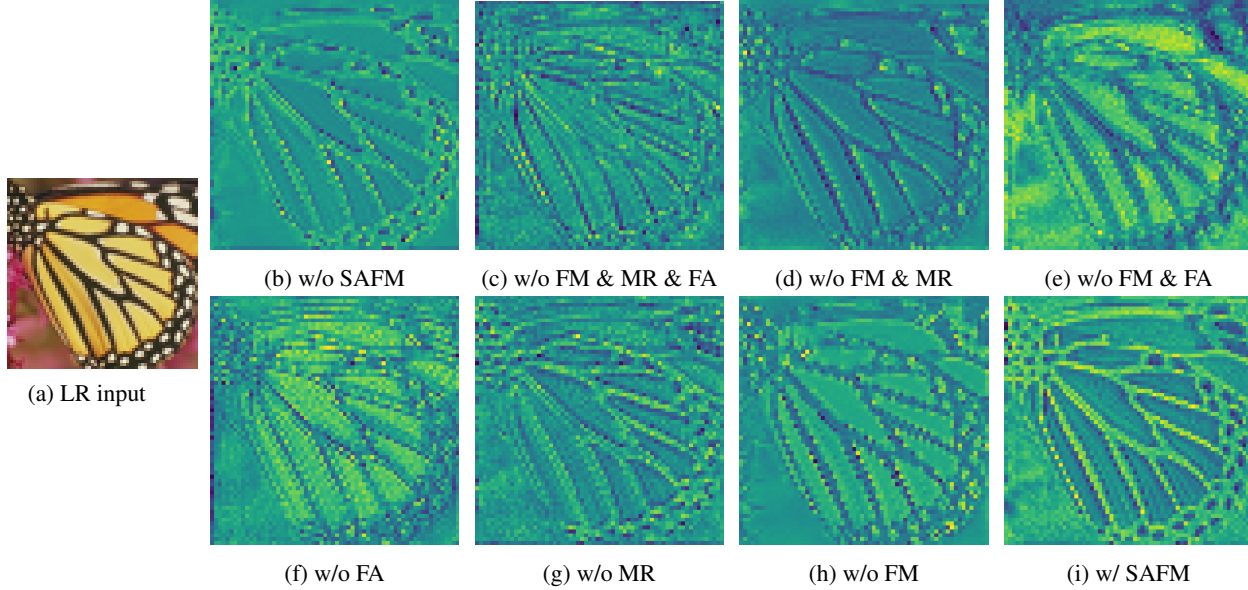

Figure 1. **Illustration of the learned deep features from ablations in the SAFM.** We average the features before the upsampling layer in the channel dimension and show the corresponding results. The proposed SAFM layer includes three components: feature modulation (FM), multi-scale representation (MR), and feature aggregation (FA). (h) indicates that the model pays less attention to the high-frequency regions without the feature modulation. (g) shows that the model fails to capture long-range information without the multi-scale representation. (f) illustrates the necessity of aggregating multi-scale features. The comparison of (i) with (b)-(h) suggests that the proposed method with the SAFM layer yields a finer feature representation with clearer structures that pays more attention to high-frequency details.

Table 1. **Effect of scales in the SAFM.** We evaluate the effect of features at different scales in the SAFM layer on the  $\times 4$  DIV2K validation set. The results show that removing any scale information affects the reconstruction performance.

| Variants  | SAFMN        | w/o Scale 8  | w/o Scale 8&4 | w/o Scale 8&4&2 |
|-----------|--------------|--------------|---------------|-----------------|
| DIV2K_val | 30.43/0.8372 | 30.39/0.8362 | 30.37/0.8357  | 30.34/0.8350    |

Table 2. **Efficiency comparison with the challenge winners on  $\times 4$  SR.** #GPU Mem. and #Avg. Time denote the maximum GPU memory consumption and the average running time of the inference phase, respectively. #FLOPs, #Acts and #Avg. Time are computed on an LR image with a resolution of  $320 \times 180$  pixels. Our SAFMN obtains comparable performance and a better trade-off between reconstruction performance and model complexity.

| Methods      | #Params [K] | #FLOPs [G] | #Acts [M] | #GPU Mem. [M] | #Avg. Time [ms] | B100 [PSNR/SSIM] |
|--------------|-------------|------------|-----------|---------------|-----------------|------------------|
| RFDN [13]    | 433.45      | 23.82      | 98.46     | 176.75        | 7.23            | 27.60/0.7368     |
| RLFN [7]     | 543.74      | 29.88      | 111.17    | 145.69        | 7.35            | 27.60/0.7364     |
| SAFMN (Ours) | 239.52      | 13.56      | 76.70     | 65.26         | 10.71           | 27.58/0.7359     |

### 3. Comparison with ViT-based lightweight SR methods

We compare the  $\times 4$  SR performance with ViT-based methods including ESRT [14], SwinIR-light [11], and ELAN-light [18]. We calculate their efficiency metrics in officially released codes with the `fvcore` library under super-resolving inputs to  $1280 \times 720$  pixels. As these ViT-based lightweight SR methods have parameter sizes over 600K, we scale up the proposed SAFMN with 48 channels and 12 FMMs to 610K for a fair comparison. Table 3 shows that our SAFMN-c48n12 produces competitive results with much lower computational complexity. Compared to SwinIR-light, our method has 316.53K fewer parameters and is nearly  $7\times$  faster.

### 4. Comparison with classical SR models

To verify the scalability of SAFMN, we further compare the large version of SAFMN, which has 16 FMMs with 128 channels, with the state-of-the-art classical SR methods, including EDSR [12], RCAN [19], SAN [3], HAN [15], SwinIR [11]. Table 4 shows that our SAFMN shows significant advantages in terms of model efficiency compared to the evaluated CNN-based methods and obtains competitive reconstruction performances on five public benchmarks, benefiting from its capability of multi-scale feature modulation.

Table 3. **Comparison with ViT-based lightweight SR methods.** Our SAFMN-c48n12 produces competitive results with much lower computational complexity.

| Methods             | #Params [K] | #FLOPs [G] | #Acts [G] | #GPU Mem. [M] | #Avg.Time [ms] | Set14/Manga109 [PSNR] |
|---------------------|-------------|------------|-----------|---------------|----------------|-----------------------|
| ESRT [14]           | 751.77      | 298.32     | 6.92      | 6747.72       | 115.09         | 28.69/30.75           |
| SwinIR-light [11]   | 929.63      | 61.69      | 1.28      | 368.19        | 130.28         | 28.77/30.92           |
| ELAN-light [18]     | 640.39      | 54.12      | 1.09      | 240.40        | 41.70          | 28.78/30.92           |
| SAFMN (Ours)        | 239.52      | 13.56      | 0.077     | 65.26         | 10.71          | 28.60/30.43           |
| SAFMN-c48n12 (Ours) | 613.10      | 34.84      | 0.149     | 90.14         | 16.61          | 28.77/30.93           |

Table 4. **Classical image SR results.** #Params and #FLOPs are measured under the setting of upscaling SR images to  $1280 \times 720$  pixels on all listed scales. The proposed SAFMN achieves comparable performances with significantly less computational and memory costs.

| Scale      | Methods      | #Params [M] | #FLOPs [G] | Set5         | Set14        | B100         | Urban100     | Manga109     |
|------------|--------------|-------------|------------|--------------|--------------|--------------|--------------|--------------|
| $\times 2$ | EDSR [12]    | 40.73       | 9387       | 38.11/0.9602 | 33.92/0.9195 | 32.32/0.9013 | 32.93/0.9351 | 39.10/0.9773 |
|            | RCAN [19]    | 15.45       | 3530       | 38.27/0.9614 | 34.12/0.9216 | 32.41/0.9027 | 33.34/0.9384 | 39.44/0.9786 |
|            | SAN [3]      | 15.86       | 3050       | 38.31/0.9620 | 34.07/0.9213 | 32.42/0.9028 | 33.10/0.9370 | 39.32/0.9792 |
|            | HAN [15]     | 63.61       | 14551      | 38.27/0.9614 | 34.16/0.9217 | 32.41/0.9027 | 33.35/0.9385 | 39.46/0.9785 |
|            | SAFMN (Ours) | 5.56        | 1274       | 38.28/0.9616 | 34.14/0.9220 | 32.39/0.9024 | 33.06/0.9366 | 39.56/0.9790 |
|            | SwinIR [11]  | 11.75       | 2952       | 38.42/0.9623 | 34.46/0.9250 | 32.53/0.9041 | 33.81/0.9427 | 39.92/0.9797 |
| $\times 3$ | EDSR [12]    | 43.68       | 4470       | 34.65/0.9280 | 30.52/0.8462 | 29.25/0.8093 | 28.80/0.8653 | 34.17/0.9476 |
|            | RCAN [19]    | 15.63       | 1586       | 34.65/0.9280 | 30.52/0.8462 | 29.25/0.8093 | 28.80/0.8653 | 34.17/0.9476 |
|            | SAN [3]      | 15.90       | 1620       | 34.75/0.9300 | 30.59/0.8476 | 29.33/0.8112 | 28.93/0.8671 | 34.30/0.9494 |
|            | HAN [15]     | 64.35       | 6534       | 34.75/0.9299 | 30.67/0.8483 | 29.32/0.8110 | 29.10/0.8705 | 34.48/0.9500 |
|            | SAFMN (Ours) | 5.58        | 569        | 34.80/0.9301 | 30.68/0.8485 | 29.34/0.8110 | 28.99/0.8679 | 34.66/0.9504 |
|            | SwinIR [11]  | 11.94       | 1363       | 34.97/0.9318 | 30.93/0.8534 | 29.46/0.8145 | 29.75/0.8826 | 35.12/0.9537 |
| $\times 4$ | EDSR [12]    | 43.90       | 2895       | 32.46/0.8968 | 28.80/0.7876 | 27.71/0.7420 | 26.64/0.8033 | 31.02/0.9148 |
|            | RCAN [19]    | 15.59       | 918        | 32.63/0.9002 | 28.87/0.7889 | 27.77/0.7436 | 26.82/0.8087 | 31.22/0.9173 |
|            | SAN [3]      | 15.86       | 937        | 32.64/0.9003 | 28.92/0.7888 | 27.78/0.7436 | 26.79/0.8068 | 31.18/0.9169 |
|            | HAN [15]     | 64.20       | 3776       | 32.64/0.9002 | 28.90/0.7890 | 27.80/0.7442 | 26.85/0.8094 | 31.42/0.9177 |
|            | SAFMN (Ours) | 5.60        | 321        | 32.65/0.9005 | 28.96/0.7898 | 27.82/0.7440 | 26.81/0.8058 | 31.59/0.9192 |
|            | SwinIR [11]  | 11.90       | 774        | 32.92/0.9044 | 29.09/0.7950 | 27.92/0.7489 | 27.45/0.8254 | 32.03/0.9260 |

Table 5. **Quantitative comparison results on the Urban100 dataset.** Our proposed method performs less well in PSNR/SSIM but is comparable to IMDN and LAPAR in perceptual metrics, including NIQE and LPIPS.

| Scale      | Methods      | #Params [K] | #FLOPs [G] | #Acts [M] | PSNR  | SSIM   | NIQE | LPIPS  |
|------------|--------------|-------------|------------|-----------|-------|--------|------|--------|
| $\times 2$ | IMDN [4]     | 694         | 159        | 423       | 32.17 | 0.9283 | 4.59 | 0.1132 |
|            | LAPAR-A [9]  | 548         | 171        | 677       | 32.17 | 0.9250 | 4.55 | 0.1129 |
|            | SAFMN (Ours) | 228         | 52         | 299       | 31.84 | 0.9256 | 4.60 | 0.1138 |
| $\times 3$ | IMDN [4]     | 703         | 72         | 190       | 28.17 | 0.8519 | 5.21 | 0.2136 |
|            | LAPAR-A [9]  | 594         | 114        | 505       | 28.15 | 0.8523 | 5.21 | 0.2163 |
|            | SAFMN (Ours) | 233         | 23         | 134       | 27.95 | 0.8474 | 5.28 | 0.2134 |
| $\times 4$ | IMDN [4]     | 715         | 41         | 108       | 26.04 | 0.7838 | 5.69 | 0.2879 |
|            | LAPAR-A [9]  | 659         | 94         | 452       | 26.14 | 0.7871 | 5.63 | 0.2868 |
|            | SAFMN (Ours) | 240         | 14         | 77        | 25.97 | 0.7809 | 5.79 | 0.2881 |

## 5. Some notes on the Urban100 dataset

As shown in Table 5, the proposed SAFMN obtains a weak PSNR performance on the Urban100 dataset compared to other state-of-the-art methods, e.g., IMDN [4] and LAPAR-A [9]. The slight local luminance differences are responsible for these results. Since PSNR measures pixel-level distances rather than overall structure, slight differences in the luminance channel could lead to significant differences in PSNR. Furthermore, we visually compare images with a significant PSNR gap between our SAFMN and IMDN and observe no detectable changes in perceptual quality. Thus, we reevaluate these results using two commonly-used perceptual metrics: NIQE and LPIPS. Table 5 lists the quantitative results, and the proposed method achieves comparable performance to IMDN and LAPAR-A in terms of NIQE and LPIPS.

## 6. More visual results

In this section, we present additional visual comparisons with state-of-the-art methods [6, 1, 8, 4, 16] on the  $\times 4$  Urban100 dataset. Figure 3 shows that the proposed algorithm generates clearer images with finer detailed structures than those by state-of-the-art methods.

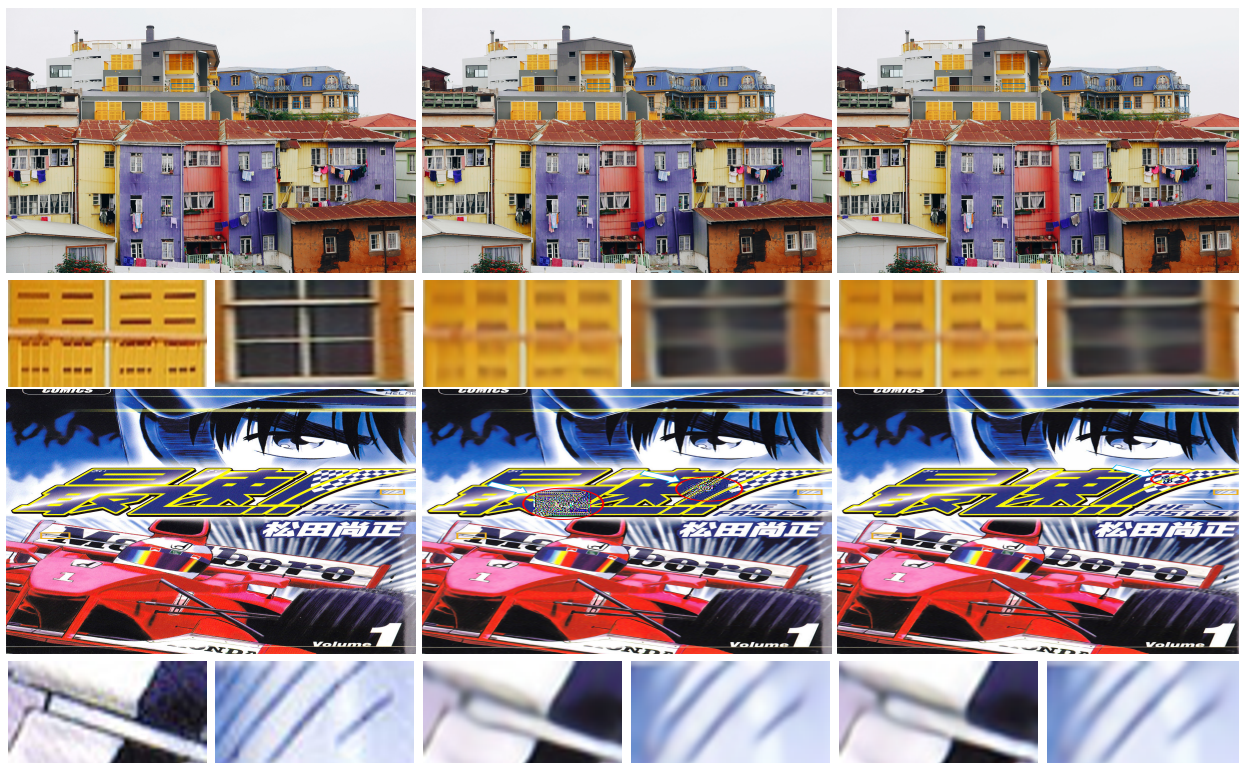

(a) GT

(b) BatchNorm [5]

(c) Frozen BatchNorm [5]

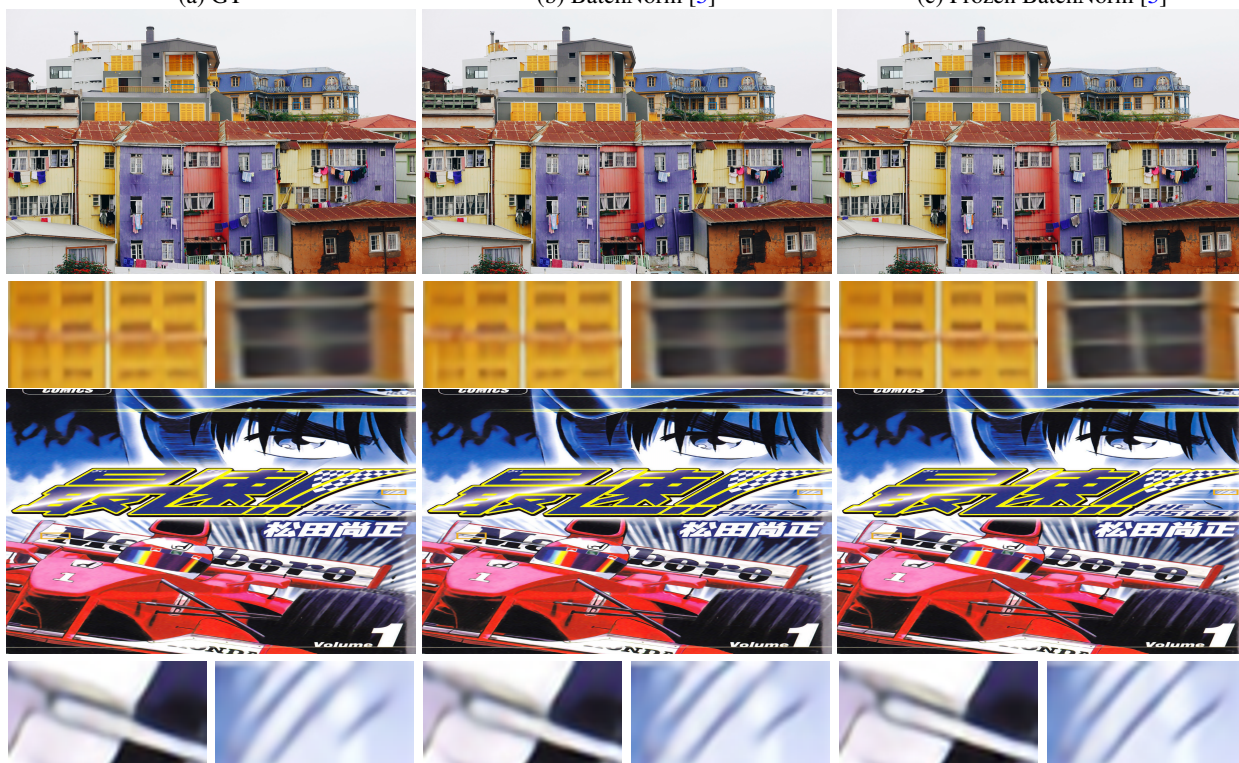

(d)  $L_2$  normalization

(e) w/o LayerNorm [2]

(f) w/ LayerNorm [2]

Figure 2. **Visual results of different normalization methods.** The proposed model with LayerNorm layers reconstructs better images.

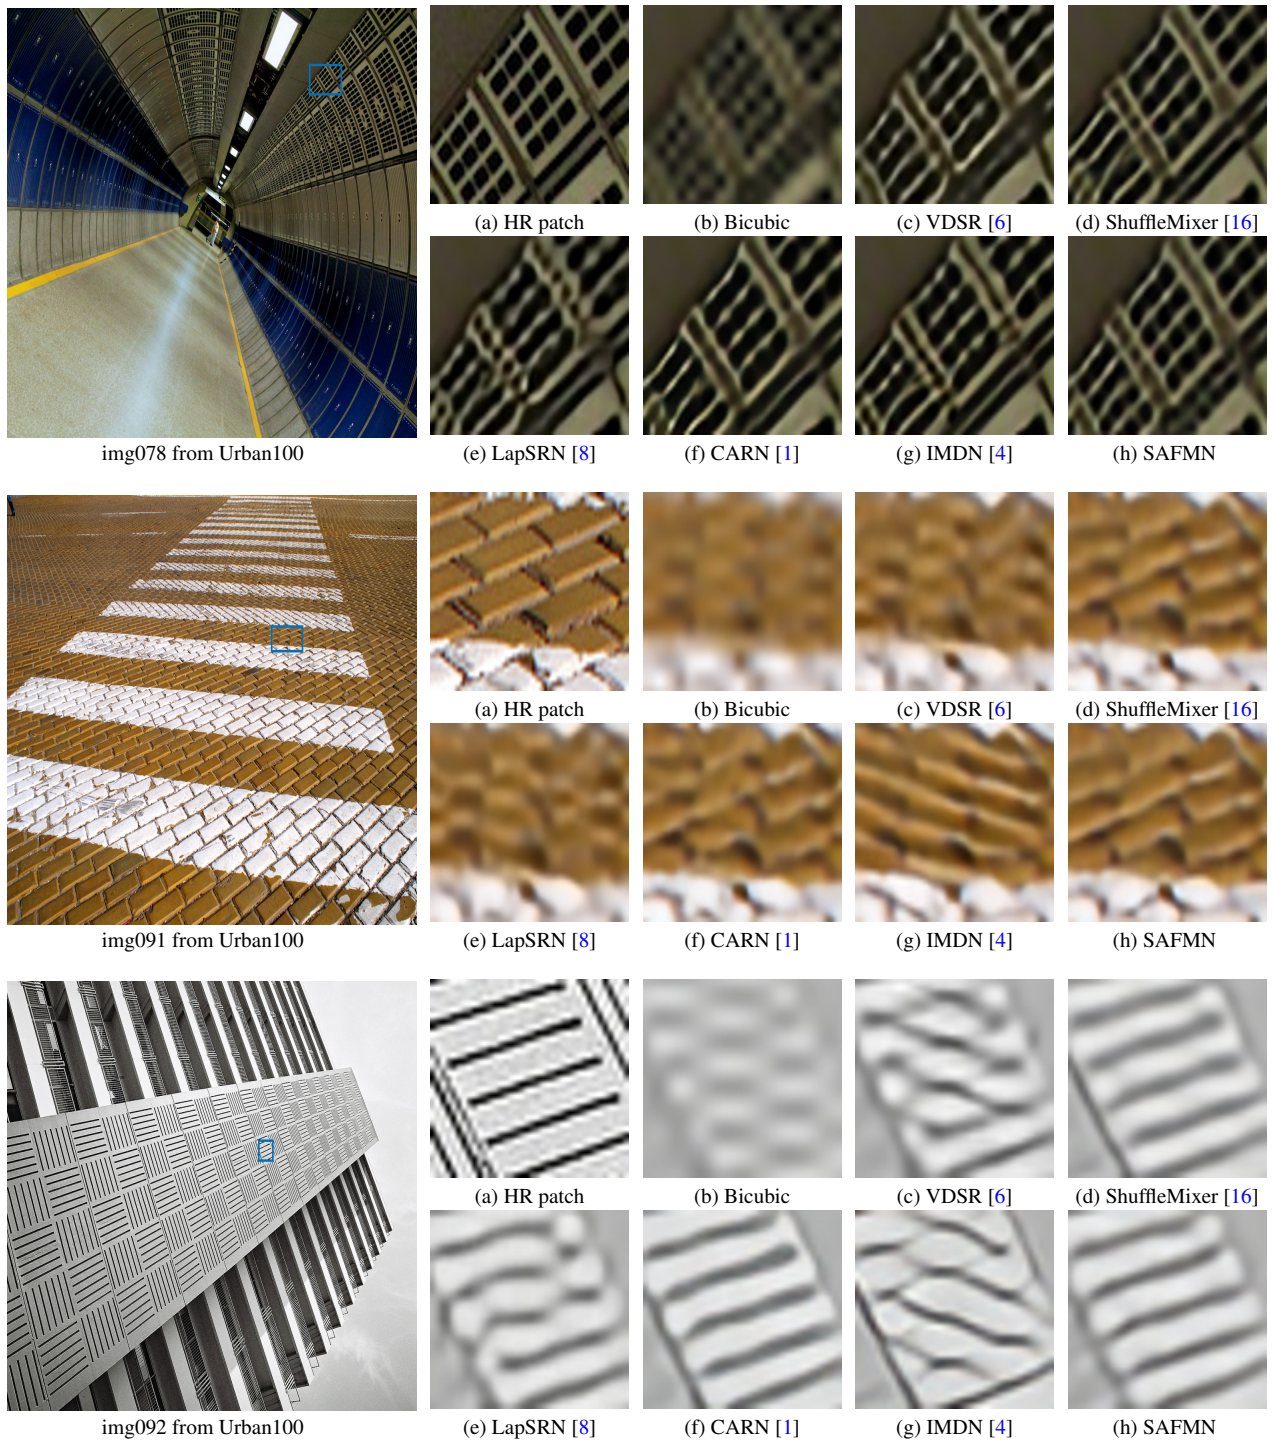

Figure 3. **Visual comparisons for  $\times 4$  SR on the Urban100 dataset.** Our method generates images with clearer structures.

## References

- [1] Namhyuk Ahn, Byungkun Kang, and Kyung-Ah Sohn. Fast, accurate, and lightweight super-resolution with cascading residual network. In *ECCV*, 2018. 3, 5
- [2] Jimmy Lei Ba, Jamie Ryan Kiros, and Geoffrey E. Hinton. Layer normalization. *arXiv preprint arXiv:1607.06450*, 2016. 1, 4
- [3] Tao Dai, Jianrui Cai, Yongbing Zhang, Shu-Tao Xia, and Lei Zhang. Second-order attention network for single image super-resolution. In *CVPR*, 2019. 2, 3
- [4] Zheng Hui, Xinbo Gao, Yunchu Yang, and Xiumei Wang. Lightweight image super-resolution with information multi-distillation network. In *ACM MM*, 2019. 3, 5
- [5] Sergey Ioffe and Christian Szegedy. Batch normalization: Accelerating deep network training by reducing internal covariate shift. In *ICML*, 2015. 1, 4
- [6] Jiwon Kim, Jung Kwon Lee, and Kyoung Mu Lee. Accurate image super-resolution using very deep convolutional networks. In *CVPR*, 2016. 3, 5
- [7] Fangyuan Kong, Mingxi Li, Songwei Liu, Ding Liu, Jingwen He, Yang Bai, Fangmin Chen, and Lean Fu. Residual local feature network for efficient super-resolution. In *CVPR Workshops*, 2022. 2
- [8] Wei-Sheng Lai, Jia-Bin Huang, Narendra Ahuja, and Ming-Hsuan Yang. Deep laplacian pyramid networks for fast and accurate super-resolution. In *CVPR*, 2017. 3, 5
- [9] Wenbo Li, Kun Zhou, Lu Qi, Nianjuan Jiang, Jiangbo Lu, and Jiaya Jia. LAPAR: Linearly-assembled pixel-adaptive regression network for single image super-resolution and beyond. In *NeurIPS*, 2020. 3
- [10] Yawei Li, Kai Zhang, Luc Van Gool, Radu Timofte, et al. NTIRE 2022 challenge on efficient super-resolution: Methods and results. In *CVPR Workshops*, 2022. 1
- [11] Jingyun Liang, Jiezhong Cao, Guolei Sun, Kai Zhang, Luc Van Gool, and Radu Timofte. SwinIR: Image restoration using swin transformer. In *ICCV Workshops*, 2021. 2, 3
- [12] Bee Lim, Sanghyun Son, Heewon Kim, Seungjun Nah, and Kyoung Mu Lee. Enhanced deep residual networks for single image super-resolution. In *CVPR Workshops*, 2017. 2, 3
- [13] Jie Liu, Jie Tang, and Gangshan Wu. Residual feature distillation network for lightweight image super-resolution. In *ECCV Workshops*, 2020. 2
- [14] Zhisheng Lu, Juncheng Li, Hong Liu, Chaoyan Huang, Linlin Zhang, and Tiejong Zeng. Transformer for single image super-resolution. In *CVPR Workshops*, 2022. 2, 3
- [15] Ben Niu, Weilei Wen, Wenqi Ren, Xiangde Zhang, Lianping Yang, Shuzhen Wang, Kaihao Zhang, Xiaochun Cao, and Haifeng Shen. Single image super-resolution via a holistic attention network. In *ECCV*, 2020. 2, 3
- [16] Long Sun, Jinshan Pan, and Jinhui Tang. ShuffleMixer: An efficient convnet for image super-resolution. In *NeurIPS*, 2022. 3, 5
- [17] Kai Zhang, Martin Danelljan, Yawei Li, and et al. AIM 2020 challenge on efficient super-resolution: Methods and results. In *ECCV Workshops*, 2020. 1
- [18] Xindong Zhang, Hui Zeng, Shi Guo, and Lei Zhang. Efficient long-range attention network for image super-resolution. In *ECCV*, 2022. 2, 3
- [19] Yulun Zhang, Kunpeng Li, Kai Li, Lichen Wang, Bineng Zhong, and Yun Fu. Image super-resolution using very deep residual channel attention networks. In *ECCV*, 2018. 2, 3
